# Supplementary material
Source: MDPI journal article supplement (https://www.mdpi.com/2073-4441/12/6/1692)
Supplement: s1 [file s1]

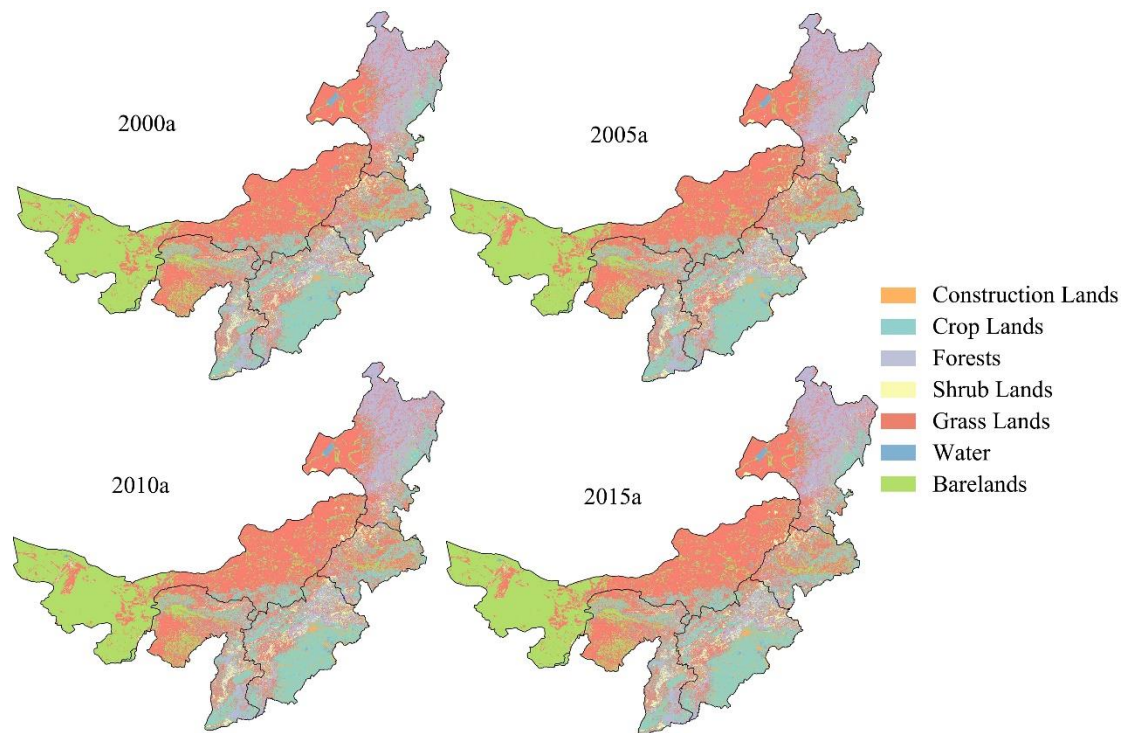

**Fig.1 Spatial distribution of land use types in North China.**

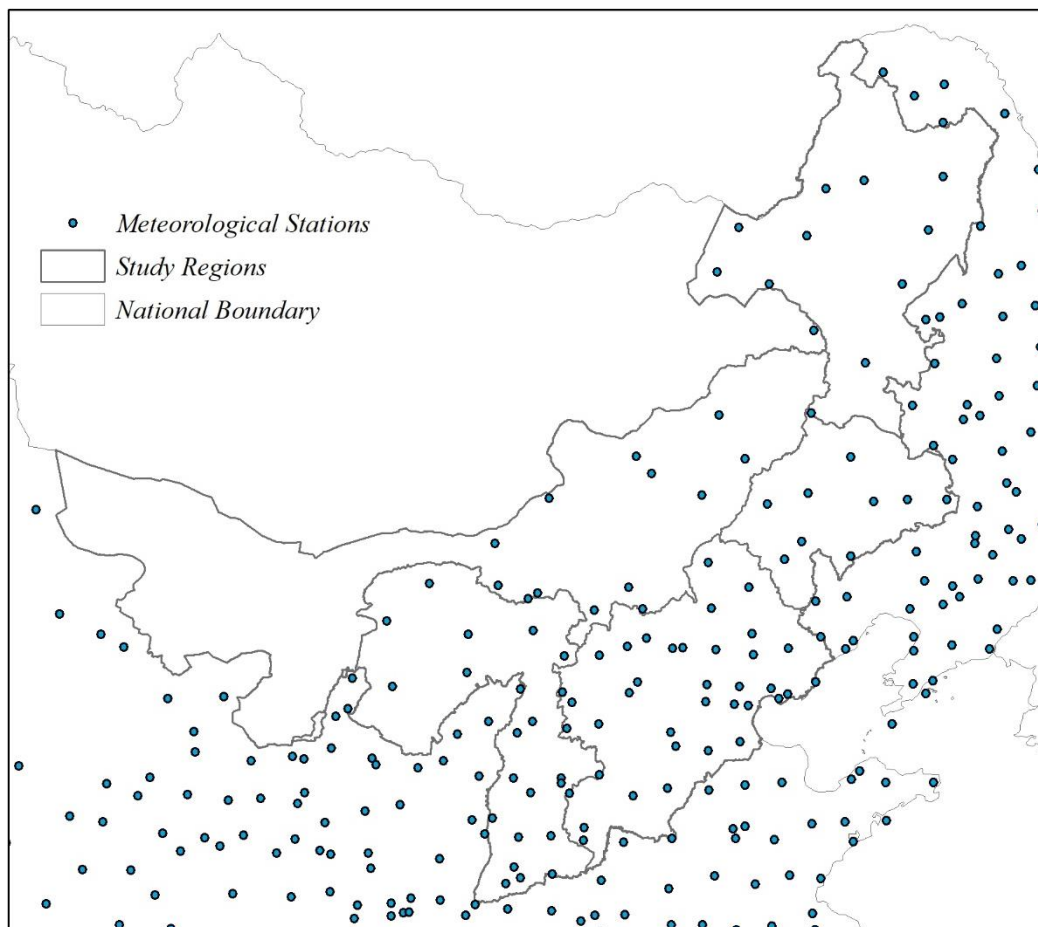

**Fig.2 Spatial distribution of meteorological stations in North China.**

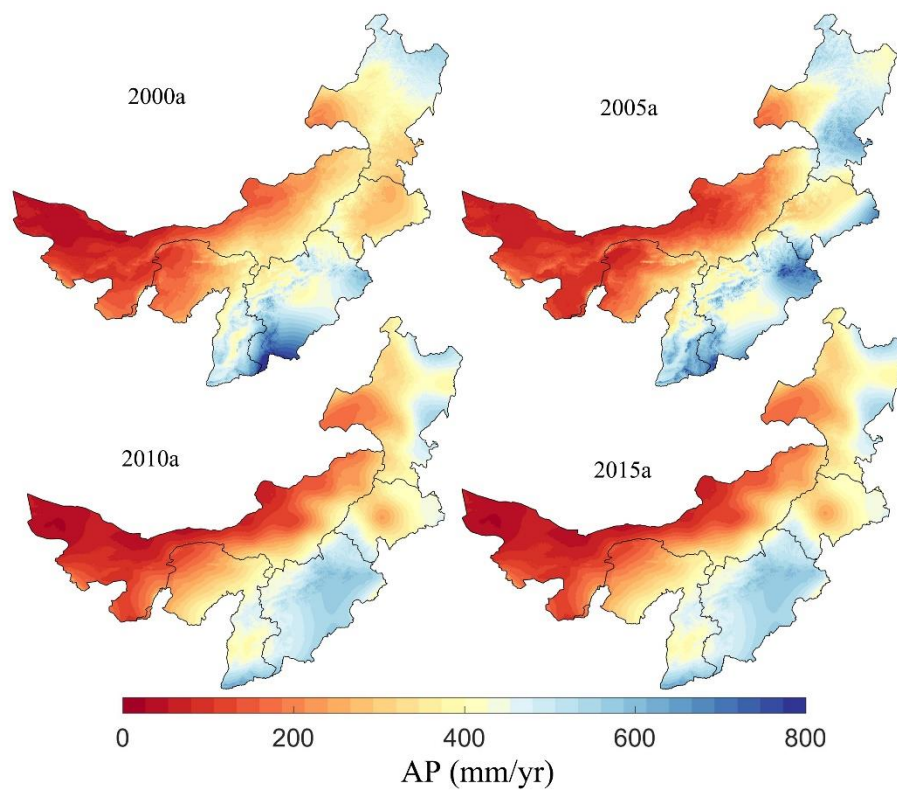

**Fig.3 Spatial distribution of annual precipitation (AP) in North China.**

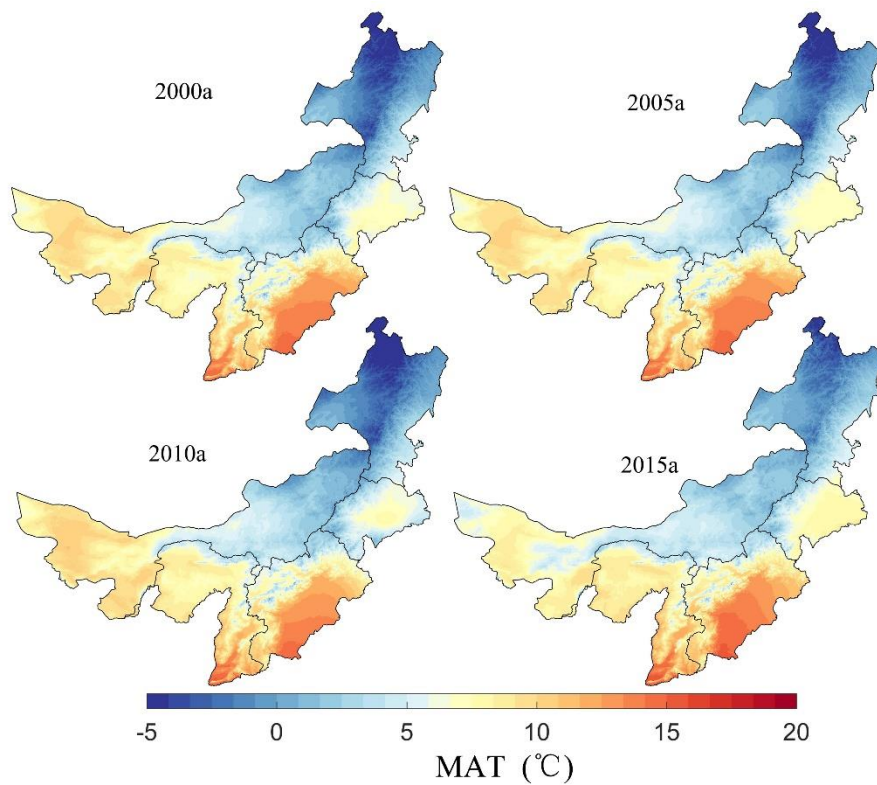

**Fig.4 Spatial distribution of mean annual temperature (MAT) in North China.**

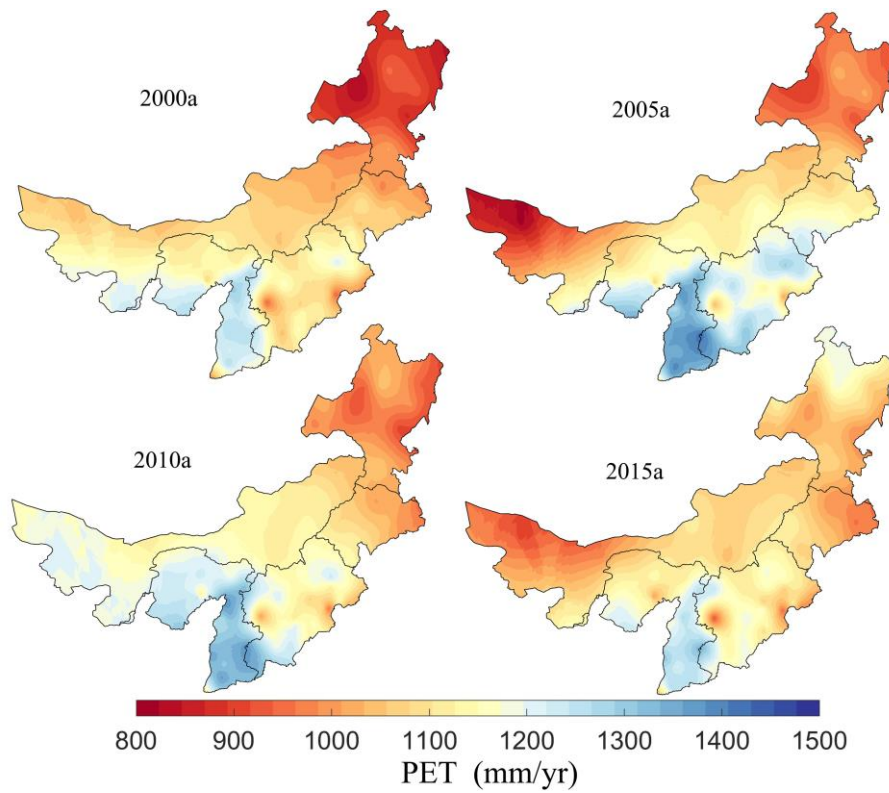

**Fig.5 Spatial distribution of potential evapotranspiration in North China.**

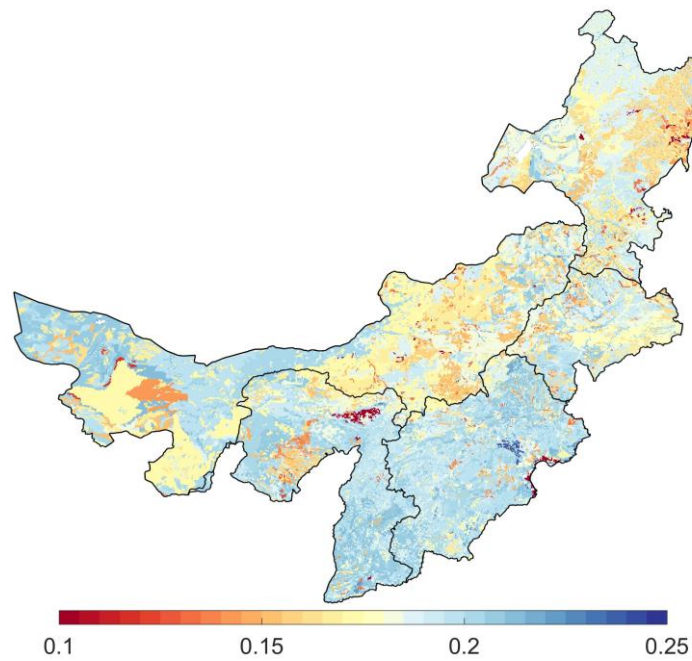

**Fig.6 Spatial distribution of plant available water capacity in North China.**

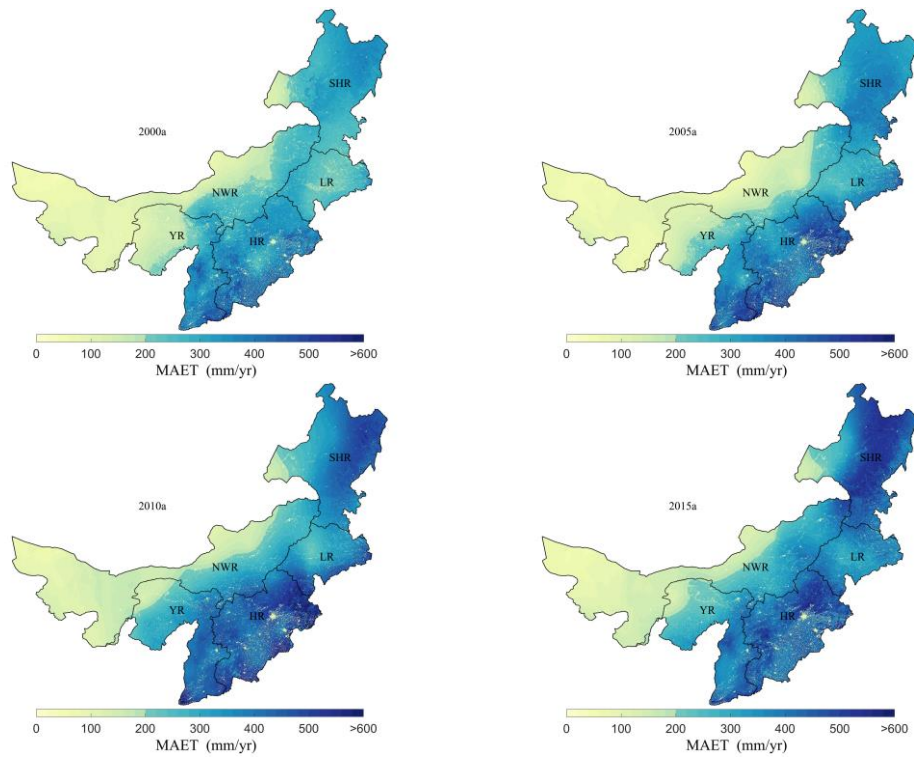

**Fig.7 Spatial distribution of mean annual actual evapotranspiration (MAET) in North China.**

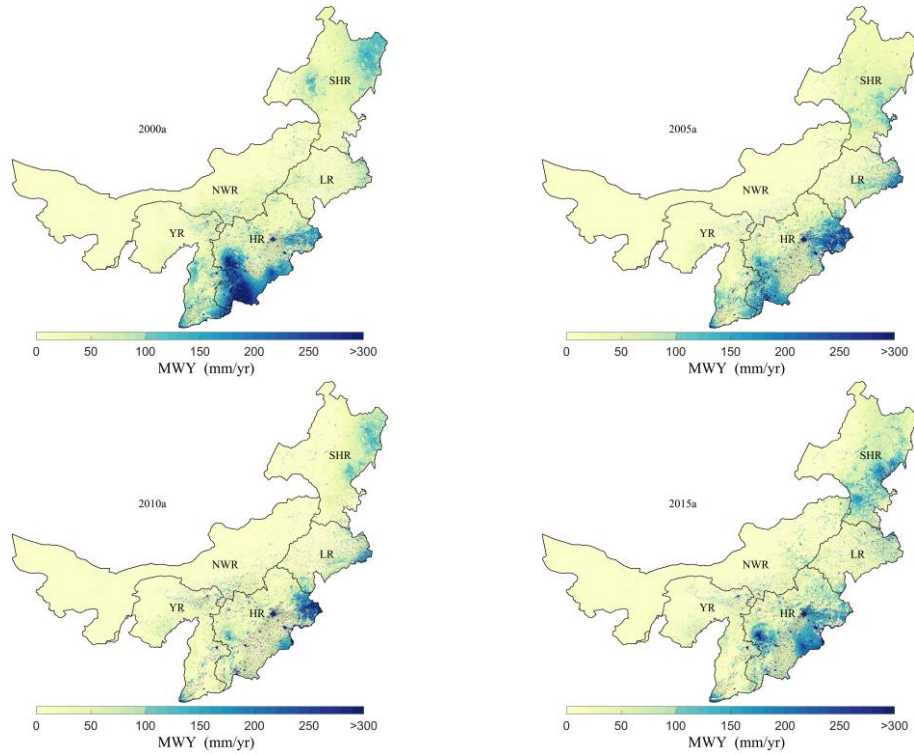

**Fig.8 Spatial distribution of mean water yield (MWY) in North China.**
